# Supplementary material
Source: PubMed Central journal article supplement (PMC5985727)
Supplement: ddy112_supplemental.pdf [file ddy112_supplemental.pdf]

## Supplemental Material

### Microglia Activation in Niemann-Pick Disease, type C1 is Amendable to Therapeutic Intervention

Cougnoux et al.

|                                                                                                                                                            | <b>Page</b> |
|------------------------------------------------------------------------------------------------------------------------------------------------------------|-------------|
| <b>Table S1.</b> Selected differentially expressed genes.                                                                                                  | 1           |
| <b>Figure S1.</b> FACS analysis of peripheral immune cell infiltration into brain tissue of NPC1 mice and comparison to other lysosomal storage disorders. | 3           |
| <b>Figure S2.</b> Reciprocal bone marrow transplantation in <i>Npc1</i> mutant and control mice.                                                           | 5           |
| <b>Figure S3.</b> Gating strategy for FACS analysis.                                                                                                       | 6           |
| <b>Figure S4.</b> Microglia purification for transcriptome analysis.                                                                                       | 7           |
| <b>Figure S5.</b> Phagocytosis and killing of live <i>Escherichia coli</i> by <i>Npc1</i> <sup>+/+</sup> and <i>Npc1</i> <sup>-/-</sup> microglia.         | 8           |
| <b>Figure S6.</b> Differential expression of glycolysis associated genes.                                                                                  | 9           |
| <b>Figure S7.</b> Effect of PX-478 inhibition of HIF1 $\alpha$ in <i>Npc1</i> mutant mice.                                                                 | 10          |
| <b>Figure S8.</b> Effect of HP $\beta$ CD treatment on <i>Npc1</i> <sup>-/-</sup> microglia.                                                               | 12          |

## Supplementary Table 1. Selected differentially expressed genes

| Gene                              | Log2FC | pAdj     |  | Gene                                     | Log2FC | pAdj     |  | Gene                                                            | Log2FC | pAdj     |
|-----------------------------------|--------|----------|--|------------------------------------------|--------|----------|--|-----------------------------------------------------------------|--------|----------|
| <b>Cytokines</b>                  |        |          |  | <b>CXC Ligands &amp; Receptors</b>       |        |          |  | <b>Phagosome processing, maturation and signal transduction</b> |        |          |
| <i>Il1a</i>                       | -0.44  | 4.19E-02 |  | <i>Cxcl10</i>                            | 2.96   | 5.30E-09 |  | <i>Pla2g4a</i>                                                  | -0.70  | 4.12E-09 |
| <i>Il1b</i>                       | 2.25   | 6.47E-21 |  | <i>Cxcl11</i>                            | 3.86   | 1.22E-14 |  | <i>Pld2</i>                                                     | -0.17  | 6.51E-01 |
| <i>Il1r1</i>                      | 2.27   | 1.50E-07 |  | <i>Cxcl14</i>                            | 1.95   | 3.30E-05 |  | <i>Cnm2</i>                                                     | -1.60  | 1.02E-06 |
| <i>Il1rn</i>                      | 3.18   | 1.37E-13 |  | <i>Cxcl16</i>                            | 1.09   | 9.15E-09 |  | <i>Pld1</i>                                                     | -1.03  | 2.90E-06 |
| <i>Il2rg</i>                      | 1.88   | 2.39E-04 |  | <i>Cxcr4</i>                             | 2.63   | 1.45E-08 |  | <i>Axl</i>                                                      | 2.70   | 1.73E-94 |
| <i>Tnf</i>                        | 1.18   | 2.87E-03 |  | <i>Cx3cr1</i>                            | -0.77  | 7.84E-11 |  | <i>Clic4</i>                                                    | 1.21   | 4.36E-08 |
| <i>Tgfa</i>                       | 0.68   | 9.30E-05 |  |                                          |        |          |  | <i>Csk</i>                                                      | -0.44  | 2.00E-03 |
| <i>Tgfb1</i>                      | -0.45  | 1.08E-03 |  | <b>Phagocytosis associated receptors</b> |        |          |  | <i>Lyn</i>                                                      | -0.30  | 4.47E-02 |
| <i>Tgfb2</i>                      | 1.57   | 4.17E-03 |  | <i>Cd14</i>                              | -0.74  | 4.35E-05 |  | <i>Mapk14</i>                                                   | -0.64  | 1.11E-06 |
| <i>Spp1</i>                       | 3.01   | 9.20E-32 |  | <i>Cd36</i>                              | 0.87   | 4.02E-02 |  | <i>Mertk</i>                                                    | -0.66  | 3.03E-06 |
| <b>CC Ligands &amp; Receptors</b> |        |          |  | <i>Cd163</i>                             | -2.10  | 2.20E-06 |  | <i>Msn</i>                                                      | 0.81   | 4.32E-08 |
| <i>Ccl3</i>                       | 2.27   | 8.39E-25 |  | <i>Clec12a</i>                           | 1.54   | 7.59E-05 |  | <i>Pros1</i>                                                    | -0.31  | 3.93E-02 |
| <i>Ccl4</i>                       | 1.45   | 1.59E-11 |  | <i>Clec4a2</i>                           | -1.21  | 9.84E-08 |  | <i>Pten</i>                                                     | -0.51  | 1.72E-03 |
| <i>Ccl5</i>                       | 3.02   | 8.80E-12 |  | <i>Clec5a</i>                            | -0.46  | 7.58E-03 |  | <i>Rac1</i>                                                     | 0.45   | 4.23E-03 |
| <i>Ccr1</i>                       | -2.60  | 6.37E-12 |  | <i>Clec7a</i>                            | 1.93   | 4.80E-20 |  | <i>Rac2</i>                                                     | 0.48   | 2.26E-02 |
| <i>Ccr3</i>                       | -1.49  | 1.22E-02 |  | <i>Colec12</i>                           | 0.83   | 1.85E-16 |  | <i>Syk</i>                                                      | -0.30  | 8.00E-02 |
| <i>Ccr5</i>                       | -1.54  | 4.63E-16 |  | <i>Fcgr1g</i>                            | 0.57   | 6.34E-03 |  | <i>Vav1</i>                                                     | -0.47  | 2.68E-05 |
| <i>Ccr6</i>                       | -1.30  | 6.81E-18 |  | <i>Itgam</i>                             | -0.36  | 1.71E-03 |  |                                                                 |        |          |
|                                   |        |          |  | <i>Itgav</i>                             | -0.98  | 7.98E-14 |  | <b>Neurotoxic markers</b>                                       |        |          |
| <b>Purinoreceptors</b>            |        |          |  | <i>Pecam1</i>                            | -1.14  | 8.05E-04 |  | <i>Cybb</i>                                                     | 1.53   | 1.44E-08 |
| <i>P2rx1</i>                      | -1.28  | 1.61E-05 |  | <i>Tlr2</i>                              | 0.74   | 1.06E-04 |  | <i>Optn</i>                                                     | 2.02   | 3.94E-10 |
| <i>P2rx4</i>                      | 0.57   | 1.22E-04 |  | <i>Tlr3</i>                              | -0.77  | 1.23E-03 |  | <i>Mmp12</i>                                                    | 1.34   | 2.69E-03 |
| <i>P2rx7</i>                      | -0.30  | 1.46E-02 |  | <i>Tlr4</i>                              | -0.76  | 1.57E-06 |  | <i>Pde2a</i>                                                    | 3.15   | 8.67E-29 |
| <i>P2ry12</i>                     | -0.91  | 6.87E-17 |  | <i>Tlr5</i>                              | -1.96  | 2.18E-10 |  | <i>Pde3b</i>                                                    | -0.60  | 8.20E-05 |
| <i>P2ry13</i>                     | -1.05  | 2.07E-10 |  | <i>Tlr9</i>                              | -0.53  | 3.16E-03 |  | <i>Hmgb1</i>                                                    | 0.40   | 2.38E-02 |
| <i>P2ry2</i>                      | 1.45   | 1.56E-02 |  | <b>Recognition &amp; engulfment</b>      |        |          |  |                                                                 |        |          |
| <i>P2ry6</i>                      | -0.55  | 7.93E-04 |  | <i>Anxa1</i>                             | 1.21   | 2.14E-02 |  | <b>Neuroprotective markers</b>                                  |        |          |
| <b>Innate immunity markers</b>    |        |          |  | <i>C3</i>                                | 3.62   | 2.60E-64 |  | <i>Igf1</i>                                                     | 3.36   | 4.96E-27 |
| <i>Fcgr1g</i>                     | 0.57   | 6.34E-03 |  | <i>Cd44</i>                              | 1.73   | 1.35E-05 |  | <i>Igf2</i>                                                     | 1.36   | 1.41E-02 |
| <i>Fcgr1</i>                      | -0.77  | 4.69E-06 |  | <i>Cd47</i>                              | -0.63  | 9.55E-03 |  | <i>Igf2bp2</i>                                                  | 1.31   | 2.14E-04 |
| <i>Fcgr2b</i>                     | 0.33   | 2.80E-02 |  | <i>Csf1</i>                              | 2.44   | 6.18E-51 |  | <i>Igf2r</i>                                                    | 1.60   | 2.66E-04 |
| <i>Fcgr3</i>                      | -0.09  | 7.46E-01 |  | <i>Elmo1</i>                             | -0.77  | 7.67E-12 |  | <i>Ttr</i>                                                      | 1.37   | 1.99E-02 |
| <i>Fcgr4</i>                      | 0.96   | 1.93E-02 |  | <i>Mif</i>                               | 1.76   | 7.95E-09 |  | <i>Cd22</i>                                                     | 3.87   | 1.15E-93 |
| <i>Fcrl1</i>                      | 1.43   | 4.18E-03 |  | <i>Tgm2</i>                              | -0.72  | 3.35E-07 |  | <i>Vegfb</i>                                                    | 1.33   | 6.63E-13 |
| <i>Ifnar1</i>                     | 0.02   | 9.36E-01 |  | <i>Tnf</i>                               | 1.18   | 2.87E-03 |  | <i>Sod1</i>                                                     | 0.71   | 2.57E-02 |
| <i>Ifnar2</i>                     | -0.11  | 6.02E-01 |  |                                          |        |          |  | <i>Sod2</i>                                                     | 0.79   | 7.99E-04 |
| <i>Ifngr1</i>                     | -0.86  | 1.45E-10 |  |                                          |        |          |  | <i>Sod3</i>                                                     | 1.89   | 1.76E-04 |
| <i>Ifitm3</i>                     | 2.15   | 2.82E-12 |  |                                          |        |          |  | <i>Bcl2</i>                                                     | 0.88   | 6.42E-03 |

**Supplementary Table 1. Selected differentially expressed genes (continued)**

| Gene                                         | Log2FC | pAdj     | Gene                | Log2FC | pAdj     |
|----------------------------------------------|--------|----------|---------------------|--------|----------|
| <b>Other antioxidants</b>                    |        |          | <b>HIF1 pathway</b> |        |          |
| <i>Gsr</i>                                   | 1.05   | 1.84E-03 | <i>Hif1a</i>        | 1.28   | 1.39E-24 |
| <i>Sod1</i>                                  | 0.71   | 2.57E-02 | <i>Anxa2</i>        | 1.40   | 1.12E-02 |
| <i>Sod2</i>                                  | 0.79   | 7.99E-04 | <i>Btg1</i>         | -0.49  | 4.93E-03 |
| <i>Sod3</i>                                  | 1.89   | 1.76E-04 | <i>Egr1</i>         | -1.76  | 1.29E-22 |
| <i>Srxn1</i>                                 | 2.19   | 2.21E-08 | <i>Hmox1</i>        | 0.98   | 1.98E-04 |
| <i>Cyba</i>                                  | 0.62   | 2.00E-02 | <i>Lox</i>          | 4.19   | 9.83E-26 |
| <i>Scd1</i>                                  | 1.08   | 3.03E-02 | <i>Plau</i>         | -0.62  | 1.09E-03 |
| <b>Other oxidative stress response genes</b> |        |          | <i>Aldoa</i>        | 1.38   | 1.55E-12 |
| <i>Als2</i>                                  | 0.59   | 4.95E-02 | <i>F10</i>          | 1.65   | 4.62E-03 |
| <i>ApoE</i>                                  | 2.43   | 3.97E-55 | <i>Mif</i>          | 1.76   | 7.95E-09 |
| <i>Hmox1</i>                                 | 0.98   | 1.98E-04 | <i>Ldha</i>         | 1.04   | 1.07E-09 |
| <i>Pmp</i>                                   | 1.68   | 2.07E-05 | <i>Pdk1</i>         | 0.30   | 2.80E-01 |
| <i>Vim</i>                                   | 1.91   | 5.49E-12 | <i>Pfkfb3</i>       | 0.51   | 6.08E-03 |
| <b>Peroxidases</b>                           |        |          | <i>Pfkfb4</i>       | -0.48  | 2.58E-02 |
| <i>Gpx3</i>                                  | 2.88   | 7.30E-09 | <i>Pfkl</i>         | 0.56   | 1.53E-03 |
| <i>Gstk1</i>                                 | 1.00   | 4.48E-02 | <i>Pfkp</i>         | 1.59   | 4.17E-06 |
| <i>Prdx1</i>                                 | 1.18   | 4.37E-08 | <i>Pgam1</i>        | 1.31   | 5.41E-10 |
| <i>Prdx4</i>                                 | 0.64   | 3.77E-02 | <i>Pgk1</i>         | 1.11   | 3.18E-05 |
| <i>Prdx5</i>                                 | 0.67   | 4.50E-03 | <i>Tpi1</i>         | 1.29   | 6.20E-09 |
| <i>Prdx6</i>                                 | 0.87   | 5.11E-03 | <i>Bnip3</i>        | 1.28   | 2.20E-07 |
| <i>Cat</i>                                   | 0.71   | 1.52E-07 | <i>Bnip3l</i>       | 0.32   | 3.60E-02 |
| <i>Ctsb</i>                                  | 1.81   | 7.98E-45 | <i>Pim1</i>         | 1.19   | 1.62E-02 |
| <b>Glycolysis</b>                            |        |          | <i>Ccng2</i>        | -0.92  | 2.33E-12 |
| <i>Eno2</i>                                  | 1.74   | 2.94E-07 | <i>Mxil</i>         | 0.43   | 4.69E-03 |
| <i>Aldoc</i>                                 | 1.33   | 1.20E-03 | <i>Txnip</i>        | -0.96  | 5.76E-10 |
| <i>Igf1</i>                                  | 3.36   | 4.96E-27 | <i>Fos</i>          | -1.23  | 5.67E-04 |
| <i>Hif1a</i>                                 | 1.28   | 1.39E-24 | <i>Rbpj</i>         | 0.64   | 4.13E-03 |
| <i>Tpi1</i>                                  | 1.29   | 6.20E-09 | <i>Vdac1</i>        | 0.44   | 9.17E-02 |
| <i>Pkm</i>                                   | 1.49   | 3.95E-10 | <i>Ctsa</i>         | 0.65   | 8.66E-06 |
| <i>Gpi1</i>                                  | 1.03   | 2.00E-05 | <i>Dnajc5</i>       | 0.37   | 2.75E-02 |
| <i>Gapdh</i>                                 | 1.14   | 6.64E-08 | <i>Eif4ebp1</i>     | 0.78   | 1.83E-02 |
| <i>Pgk1</i>                                  | 1.11   | 3.18E-05 | <i>Lgals3</i>       | 2.74   | 2.51E-16 |
| <i>Eno1l</i>                                 | 0.64   | 2.85E-01 | <i>Map3k1</i>       | 0.39   | 8.22E-04 |

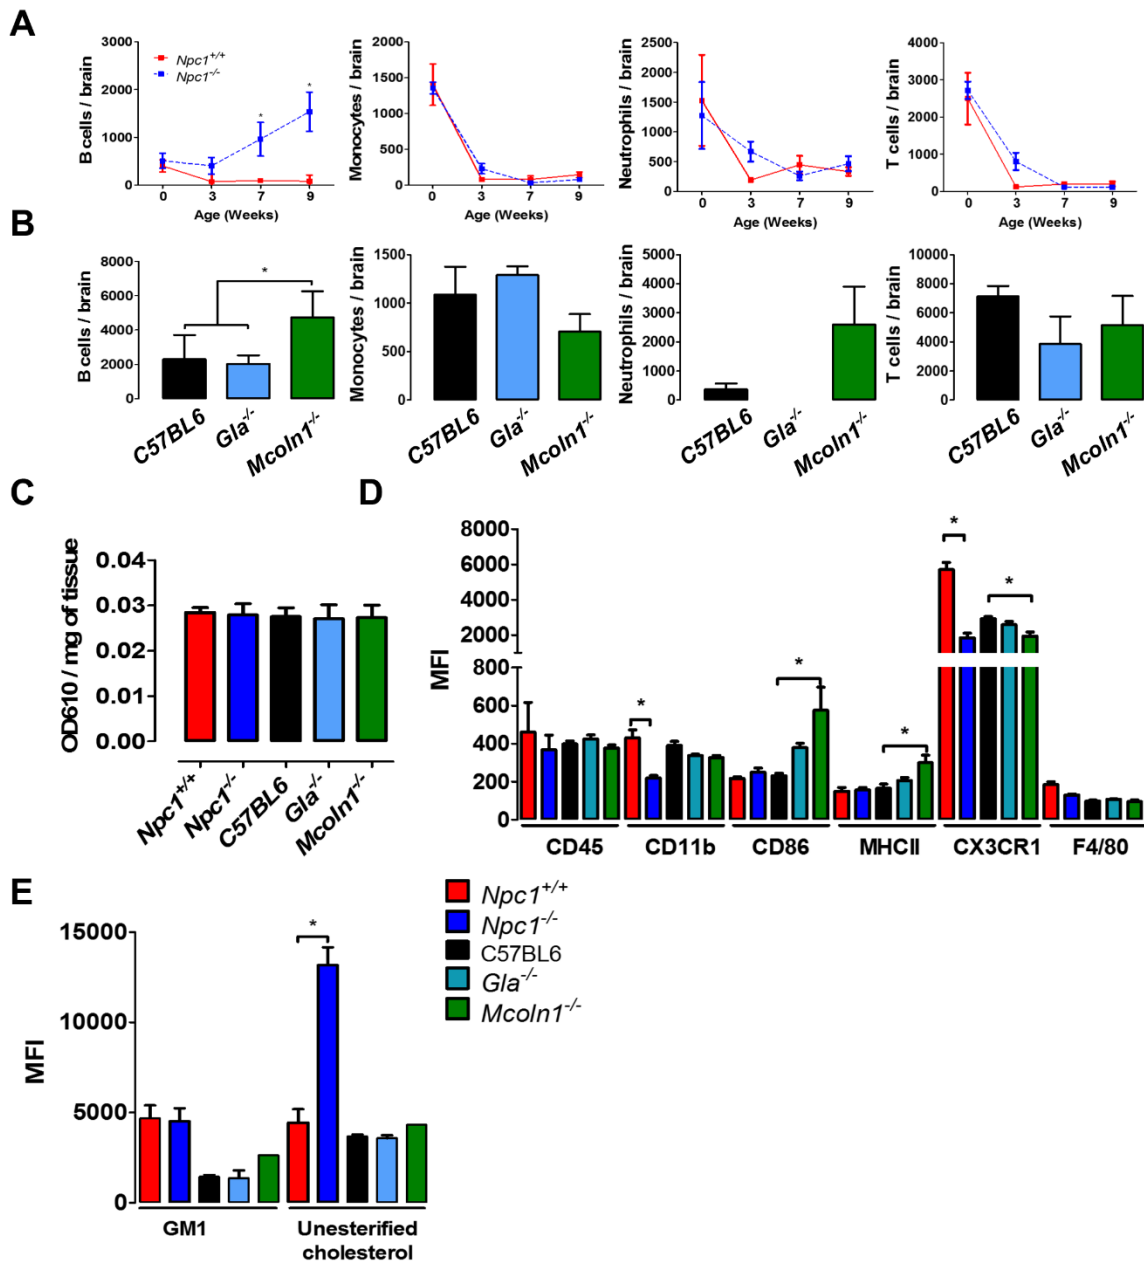

**Figure S1. FACS analysis of peripheral immune cell infiltration into brain tissue of NPC1 mice and comparison to other lysosomal storage disorders.** (A) Peripheral immune cell infiltration was evaluated in BALB/C *Npc1*<sup>+/+</sup> (red) and *Npc1*<sup>-/-</sup> (dashed blue) brain tissue at birth, 3-, 7- and 9-weeks of age by FACS analysis of surface markers of B-cells (CD19<sup>+</sup>, CD45<sup>+</sup>, MHCII<sup>+</sup>), Monocytes (Ly6C<sup>hi</sup>, CD45<sup>+</sup>, CD11b<sup>+</sup>), Neutrophils (CD45<sup>+</sup>, Ly6G<sup>+</sup>, CD11b<sup>+</sup>) and T-

cells (CD3e+, CD45+, MHCII-). Data are from n≥6 mice. **(B)** Number of B-cells, monocytes, neutrophils and T-cells in brain tissue from 4-month-old control C57BL/6, *Gla*<sup>-/-</sup> and *Mcoln1*<sup>-/-</sup> mice. Data are from n≥3 for each genotype. **(C)** Evans blue uptake measured at 610 nm normalized to tissue mass (mg) in 9-week-old BALB/C *Npc1*<sup>+/+</sup> or *Npc1*<sup>-/-</sup> and 4-month-old C57BL6 control, *Gla*<sup>-/-</sup> and *Mcoln1*<sup>-/-</sup> mice. No significant differences were observed, n≥6. **(D)** Microglia surface marker expression as mean fluorescence intensity from 7-week- old *Npc1*<sup>+/+</sup> or *Npc1*<sup>-/-</sup> and 4-month-old C57BL6, *Gla*<sup>-/-</sup> or *Mcoln1*<sup>-/-</sup> mice. Data are from n≥6. **(E)** GM1 and unesterified cholesterol accumulation quantified by staining isolated microglial cells with Alexa488-labeled cholera toxin and filipin, respectively, n≥6.

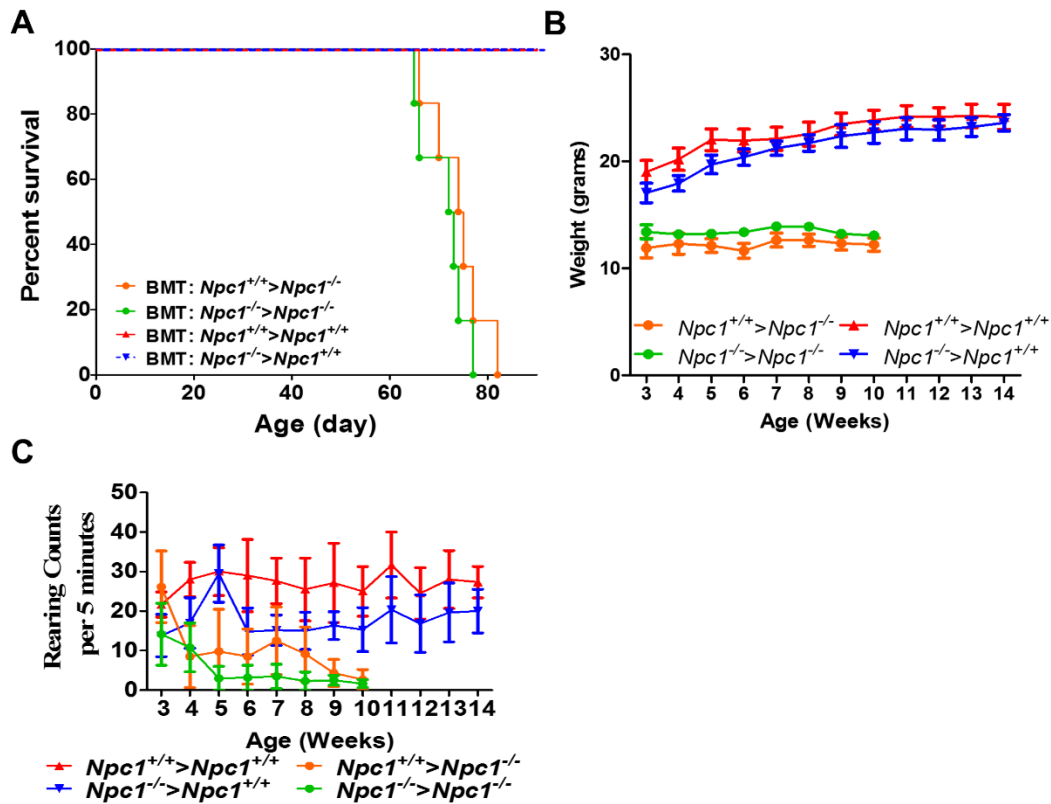

**Figure S2. Reciprocal bone marrow transplantation in *Npc1* mutant and control mice.** (A) Survival of *Npc1*<sup>-/-</sup> mice lethally irradiated and transplanted with bone marrow from either *Npc1*<sup>+/+</sup> (orange) or *Npc1*<sup>-/-</sup> (green) donors (n=6). Transplantation of *Npc1*<sup>-/-</sup> derived bone marrow into lethally irradiated *Npc1*<sup>+/+</sup> mice had no appreciable effect on survival. Mice were followed for 10 weeks after engraftment. (B) Growth curve of *Npc1*<sup>+/+</sup> or *Npc1*<sup>-/-</sup> lethally irradiated and transplanted with bone marrow from either *Npc1*<sup>+/+</sup> or *Npc1*<sup>-/-</sup> donors (n=6/group). (C) Rearing count per 5 min in *Npc1*<sup>+/+</sup> or *Npc1*<sup>-/-</sup> lethally irradiated and then transplanted with bone marrow from either *Npc1*<sup>+/+</sup> or *Npc1*<sup>-/-</sup> donors. n=6.

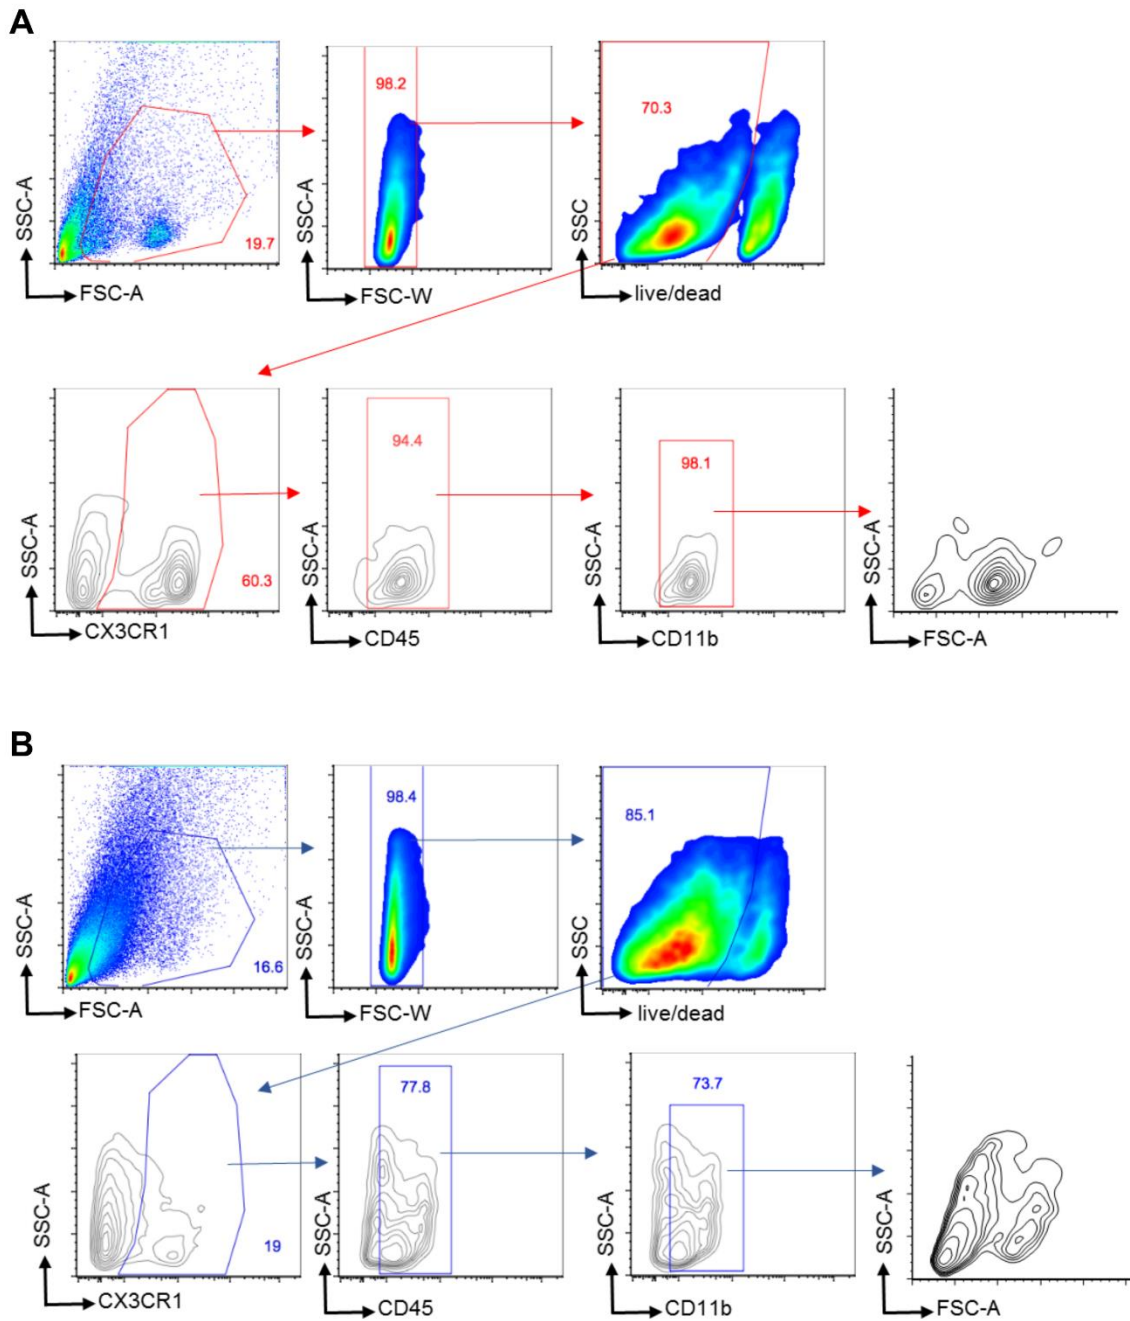

**Figure S3. Gating strategy for FACS analysis.** Representative FACS plots for 7-week old *Npc1*<sup>+/+</sup> (A) or *Npc1*<sup>-/-</sup> (B) mice.

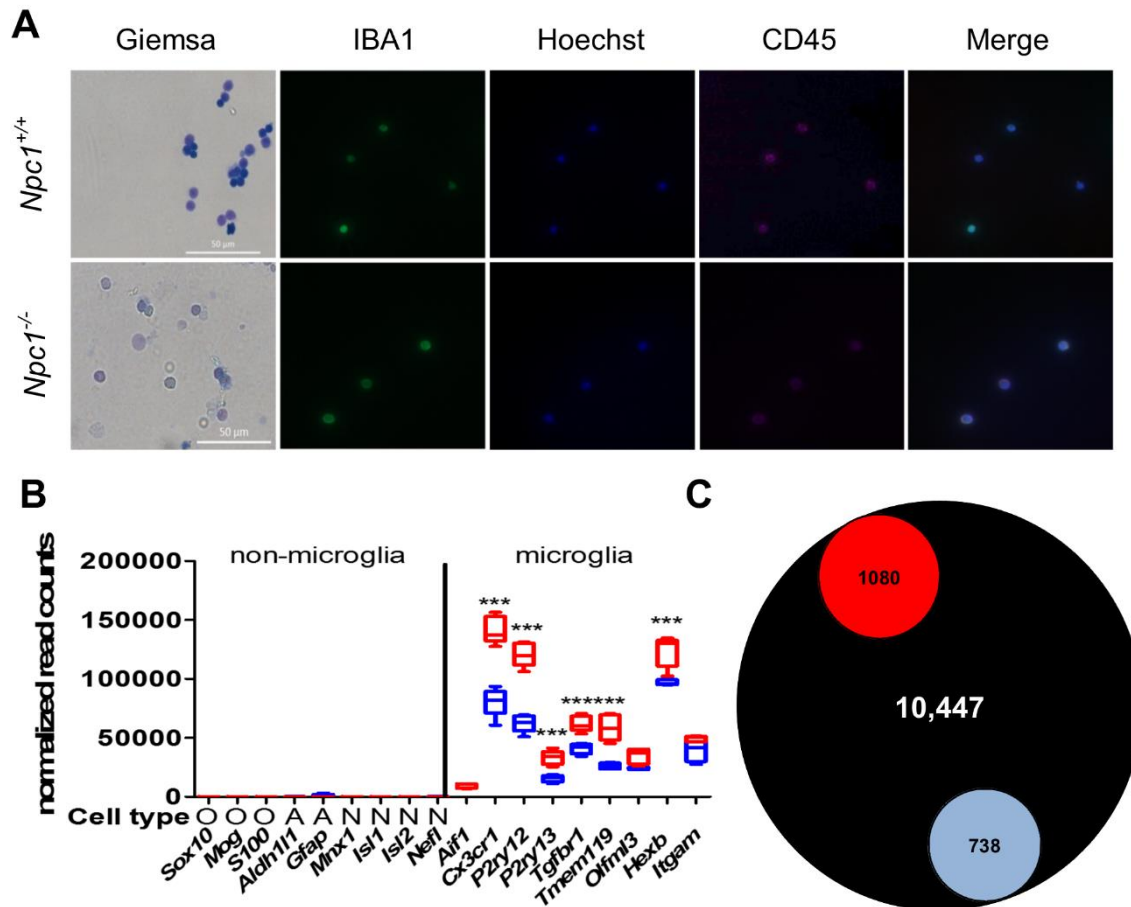

**Figure S4. Microglia purification for transcriptome analysis.** **A)** Microglia preparation stained with Giemsa (left panel). Purified control and *Npc1* mutant microglia stained with IBA1, Hoechst and CD45 (right panels). CD45 is a marker of myeloid cells and all CD45 positive cells were IBA1 positive indicating significant enrichment for microglia. **(B)** Expression of non-microglia (O= oligodendrocytes: *Sox10*, *S100*, *Mog*; A= astrocytes: *Aldh1l1*, *Gfap*; N= Neurons: *Mnx1*, *Isl1*, *Isl2*, *Nefl*) and microglia expressed genes was also used to confirm enrichment of the microglia preparation. Normalized reads count in the samples from *Npc1*<sup>+/+</sup> and *Npc1*<sup>-/-</sup> microglia. **(C)** Venn diagram of genes with total number of genes with >100 read count in at least on group (10447) and the subset of genes with significantly ( $p < 0.05$ ) increased (red, 1080) or decreased (blue, 738) expression in *Npc1*<sup>-/-</sup> relative to *Npc1*<sup>+/+</sup> microglia from 7-week-old mice.



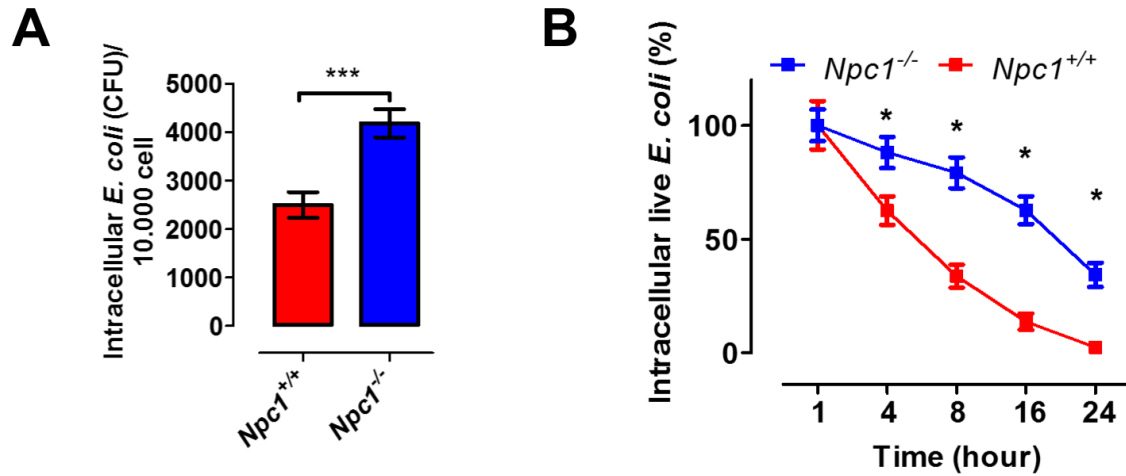

**Figure S5. Phagocytosis and killing of live *Escherichia coli* by *Npc1*<sup>+/+</sup> and *Npc1*<sup>-/-</sup> microglia.**

(A) Number of internalized *E. coli* bacterial (colony forming units) after incubation for one hour with *Npc1*<sup>+/+</sup> (red) and *Npc1*<sup>-/-</sup> (blue) microglia. (B) Kinetic analysis of bacterial killing by *Npc1*<sup>+/+</sup> (red) and *Npc1*<sup>-/-</sup> (blue) microglia. 100% represents the number of internalized *E. coli* CFU present after one hour of coincubation, n<sub>≥</sub>5.

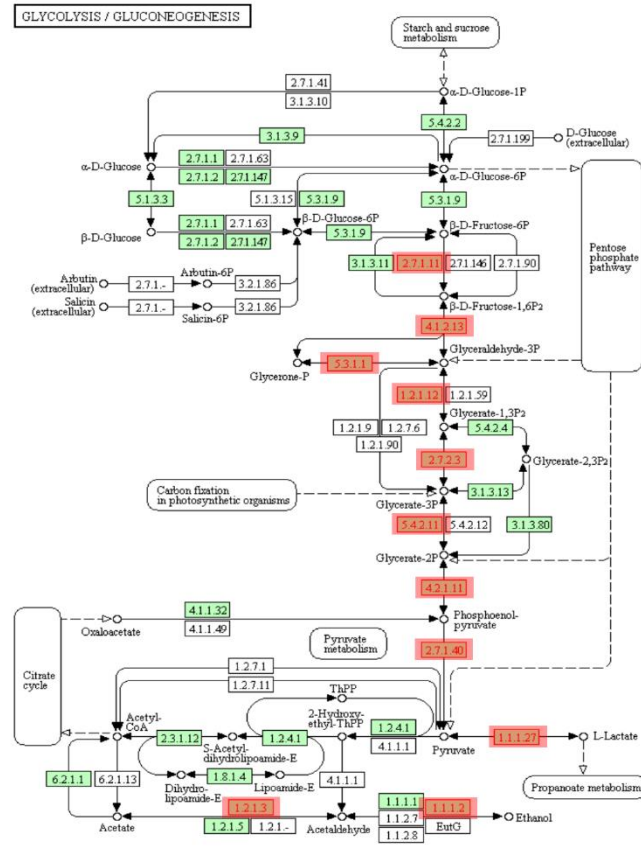

**Figure S6. Differential expression of glycolysis associated genes.** KEGG pathway of the glycolytic metabolism, genes with significantly ( $p < 0.01$ ) increased expression in *Npc1*<sup>-/-</sup> microglia are highlighted in red. See also Table S1.

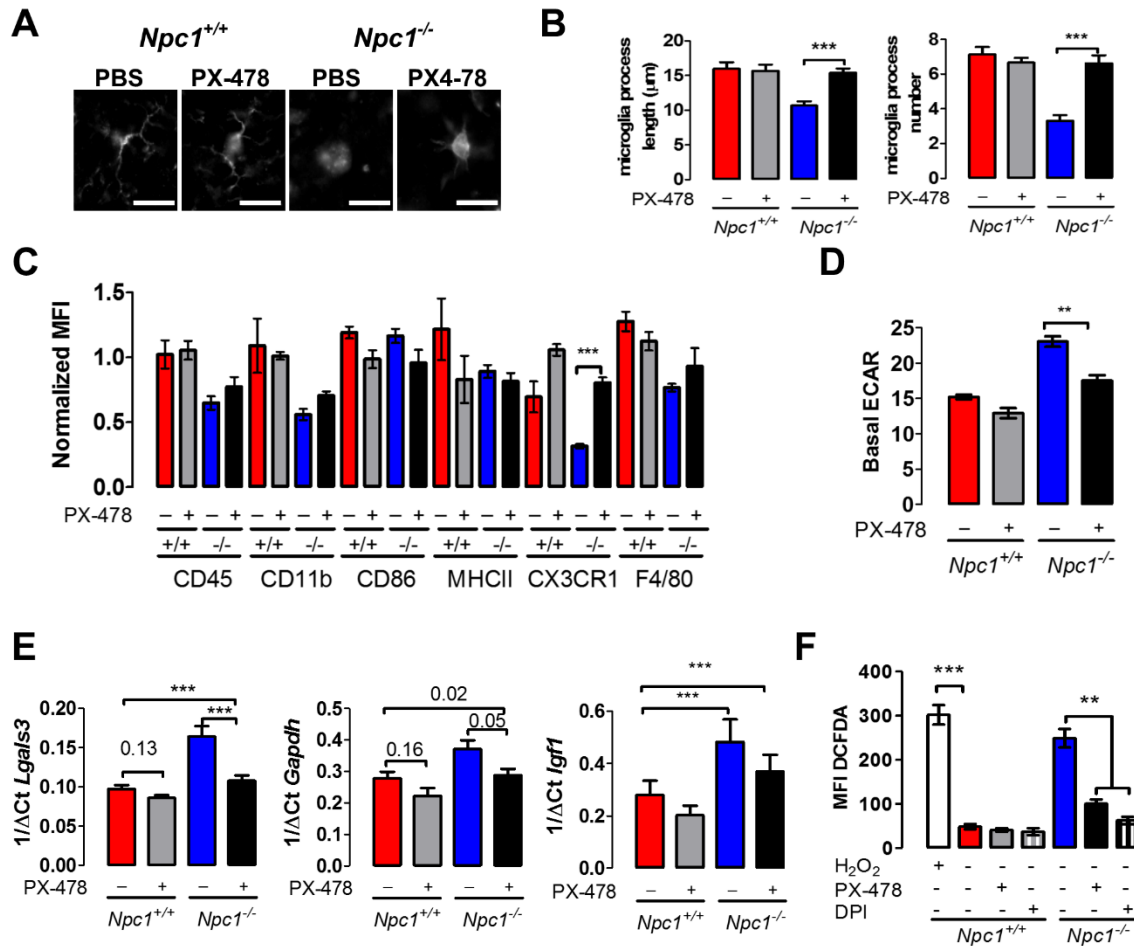

**Figure S7. Effect of PX-478 inhibition of HIF1 $\alpha$  in *Npc1* mutant mice.** (A) Representative IBA1 staining demonstrating a less activated microglial morphology in *Npc1*<sup>-/-</sup> mice treated with PX-478. (B) Consistent with the observed morphological change, PX-478 treatment increased both number and length of microglial processes in 7-week old *Npc1*<sup>-/-</sup> mice,  $n \geq 6$ . (C) Microglia surface marker expression expressed as mean fluorescence intensity (MFI) for 7-week old *Npc1*<sup>+/+</sup> or *Npc1*<sup>-/-</sup> treated with either PBS or PX-478. (D) Basal ECAR level measured by Seahorse assay was consistent with a decrease toward normal glycolytic metabolism in *Npc1*<sup>-/-</sup> microglia from PX-478 treated mice. (E) RT-qPCR expression level of HIF1 $\alpha$  target genes: *Lgals3*, *Gapdh* and *Igf1* in *Npc1*<sup>+/+</sup> and *Npc1*<sup>-/-</sup> microglia. Treatment with PX-478 decreased expression toward normal for all

three target genes in *Npc1*<sup>-/-</sup> mice. n=5/group. (F) Total ROS production was evaluated using DCFDA staining. *Npc1*<sup>-/-</sup> microglia from PX-478 treated mice showed decreased DCFDA staining consistent with decreased ROS production. Treatment of control microglia with 1μM H<sub>2</sub>O<sub>2</sub> served as a positive control for the DCFDA assay. Diphenyleneiodonium chloride (DPI) at 1μM was used to inhibit mitochondrial ROS production. Results from 3 independent experiments all with at least 3 samples. Each sample included 10000 cells.

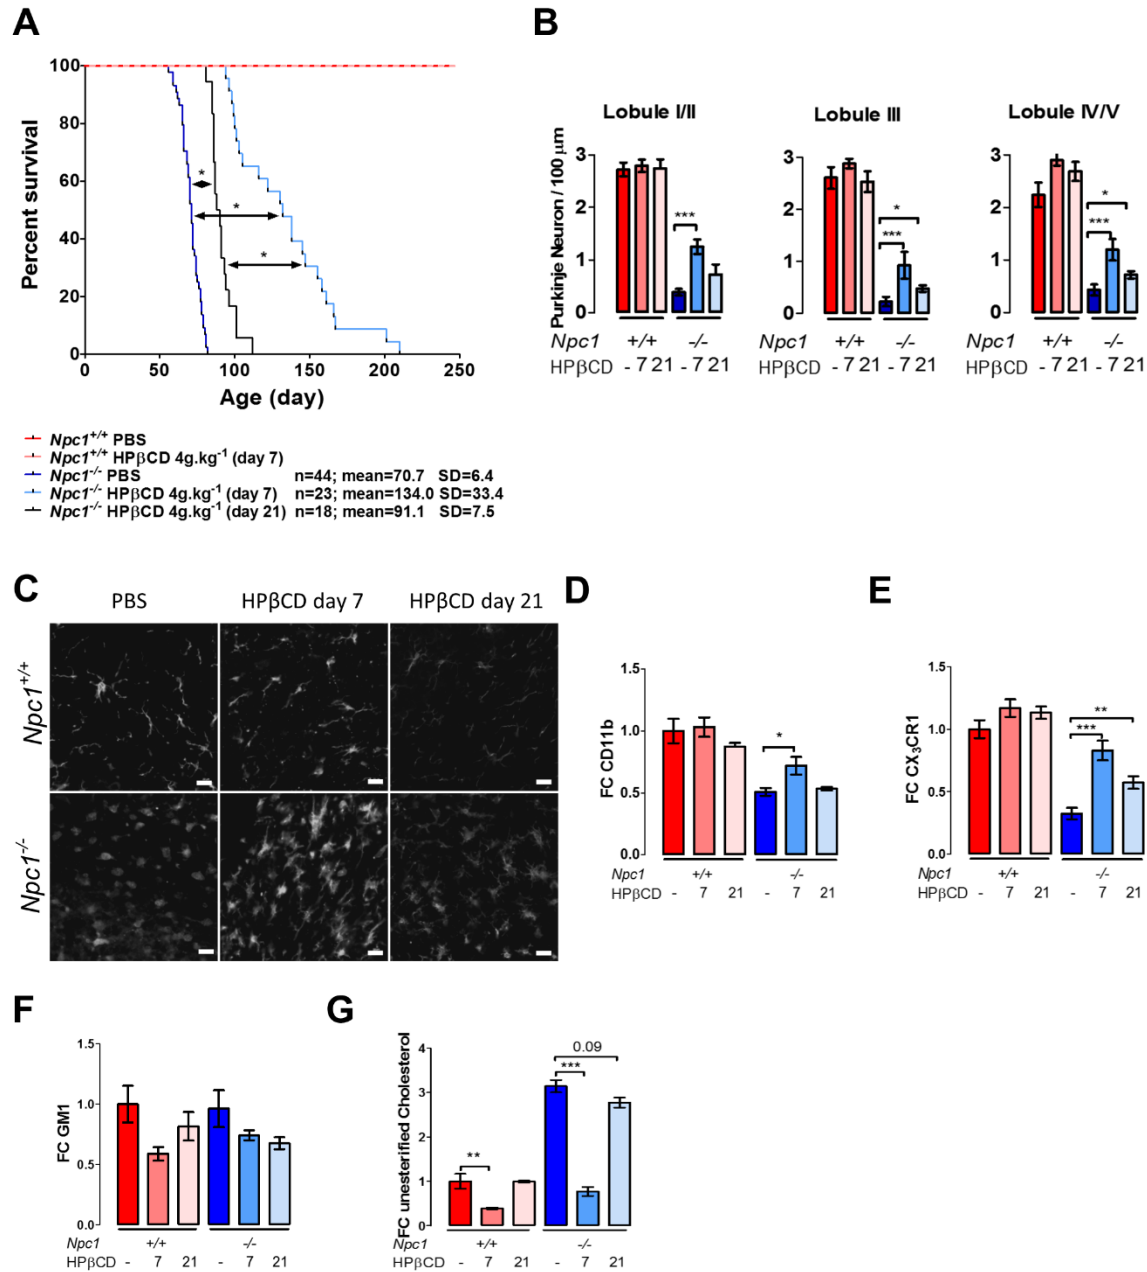

**Figure S8. Effect of HP $\beta$ CD treatment on  $Npc1^{-/-}$  microglia.** (A) Survival of  $Npc1^{-/-}$  mice treated with 4000mg.kg<sup>-1</sup> HP $\beta$ CD starting on day of life 7 (light blue) or day of life 21 (black) and then treated three times a week. Control PBS treatment is in dark blue. Survival of control  $Npc1^{+/+}$  day of life 7 HP $\beta$ CD treated (red) and untreated (orange)  $Npc1^{+/+}$  mice is also shown. (B) Quantification of cerebellar Purkinje neuron density per 100  $\mu$ m in lobules I/II, III and IV/V at 7

weeks of age. *Npc1*<sup>+/+</sup> and *Npc1*<sup>-/-</sup> mice treated with PBS or 4000mg.kg<sup>-1</sup> HPβCD starting at either day of life 7 or 21 and then administered twice a week after weaning. (C) Representative IBA1 staining showing restoration of the ramified microglial morphology in HPβCD treated *Npc1*<sup>-/-</sup> mice. (D) CD11b surface expression was only increased toward normal in *Npc1*<sup>-/-</sup> mice treated with HPβCD starting at DOL7. (E) CX<sub>3</sub>CR1 surface expression was increased toward normal in *Npc1*<sup>-/-</sup> mice treated with HPβCD starting at both DOL 7 and 21. Storage of intracellular GM1 (F) was not different from control at this age (7-weeks) nor was it changed by treatment with HPβCD. In contrast, unesterified cholesterol storage was markedly and significantly (p<0.001) decreased in *Npc1*<sup>-/-</sup> microglia when HPβCD treatment was initiated on DOL 7. We only observed a minimal trend (p=0.09) toward decreased unesterified cholesterol when HPβCD treatment was initiated on DOL 21.
